# Supplementary material for: A morphological, enzymatic and metabolic approach to elucidate apoptotic-like cell death in fungi exposed to h- and α-molybdenum trioxide nanoparticles
Source: Royal Society of Chemistry journal article supplement (doi:10.1039/c8nr06470a), 2018-01-01
Supplement: c8nr06470a1.pdf [file c8nr06470a1.pdf]

# **A morphological, enzymatic and metabolic approach to elucidate apoptotic-like cell death in fungi exposed to *h*- and $\alpha$ - molybdenum trioxide nanoparticles**

Clemencia ChavesLopez<sup>a‡</sup>, Hang N. Nguyen<sup>b‡</sup>, Rodrigo C. Oliveira<sup>c‡</sup>, Enrico T. Nadres<sup>b</sup>,  
Antonello Paparella<sup>a</sup>, Debora F. Rodrigues<sup>b\*</sup>

<sup>a</sup> *Faculty of Bioscience and Technology for Food, Agriculture and Environment, University of Teramo, Via C.R. Lerici 1, 64023 Mosciano Stazione (TE), Italy.*

<sup>b</sup> *Department of Civil and Environmental Engineering, University of Houston, Houston, TX 77204 – 4003 (U.S.A.)*

<sup>c</sup> *Department of Microbiology, University of Sao Paulo, Sao Paulo, Brazil*

*\* Corresponding author: Debora F. Rodrigues, email: [dfrigirodrigues@uh.edu](mailto:dfrigirodrigues@uh.edu)*

*‡ These authors contributed equally to this work*

### Supporting information

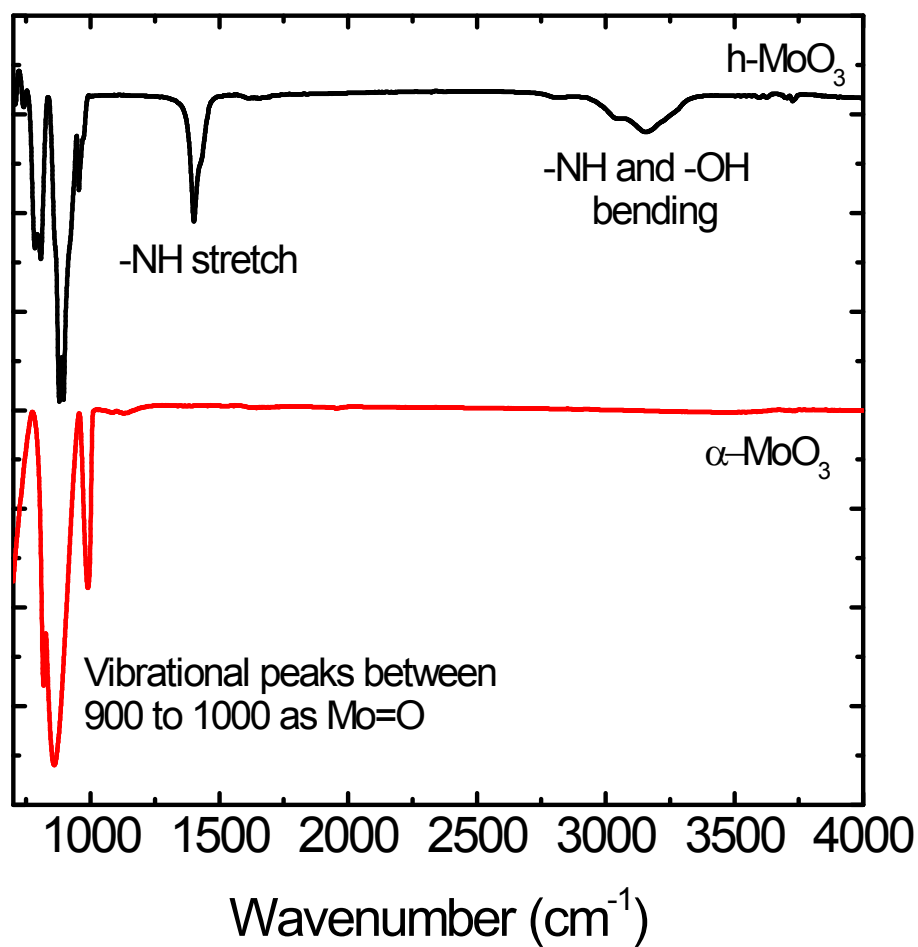

**Figure S1.** FTIR spectra of  $\text{MoO}_3$  ( $h$  and  $\alpha\text{-MoO}_3$ ). The spectrum of  $h\text{-MoO}_3$  shows a peak of the -NH and -OH bending distinguishing  $h\text{-MoO}_3$  from  $\alpha\text{-MoO}_3$ , which does not possess this peak.

Table S1. Enzymes tested in this study and detected through API ZIM test

| <b>Enzyme</b>                      | <b>Substrate</b>                             |
|------------------------------------|----------------------------------------------|
| Phosphate alkaline                 | 2-nephtyl phosphate                          |
| Esterase (C4)                      | 2-naphthyl butyrate                          |
| Esterase lipase                    | 2-naphthyl caprylate                         |
| Lipase (C14)                       | 2-naphthyl myristate                         |
| Lucine arylamidase                 | L-leucyl-2-naphtylamide                      |
| Valine arylamidase                 | L-valyl-2-naphtylamide                       |
| Cystine arylamidase                | L-cystyl-2-naphtylamide                      |
| Trypsine                           | N-benzoyl-L-arginine-2-naphtylamide          |
| Chymotrypsine                      | N-glutaryl-phenylalanine-2-naphtylamide      |
| Acid phosphatase                   | 2-naphthyl phosphate                         |
| Napthol-AS-BI-phosphohydrolase     | Napthol-AS-BI-phosphate                      |
| $\alpha$ -galactosidase            | 2-naphthyl- $\alpha$ -D-galactopyranoside    |
| $\beta$ -galactosidase             | 2-naphthyl- $\beta$ -D-galactopyranoside     |
| $\beta$ -glucoronidase             | Napthol-AS-BI- $\beta$ -D-glucopyranoside    |
| $\alpha$ -glucosidase              | 2-naphtyl- $\alpha$ -D-glucopyranoside       |
| $\beta$ -glucosidase               | 2-naphtyl- $\beta$ -D-glucopyranoside        |
| N-acetyl- $\beta$ -glucosaminidase | 1-naphtyl-N-acetyl- $\beta$ -D-glucosaminide |
| $\alpha$ -mannosidase              | 6-Br-2-naphthyl- $\alpha$ -D-manopyranoside  |

### **Stability of the nanoparticles in the Czapek media (dissolution experiment)**

The sterile czapek medium (pH 4.63) was filtered through 0.22  $\mu\text{m}$  pore size filter (VWR). The sterile  $h\text{-MoO}_3$  and  $\alpha\text{-MoO}_3$  were used for the dissolution experiment at 200 mg L<sup>-1</sup> concentration. The dissolution experiments were done as described in table S2. For the dissolution in the supernatant obtained after growing the fungi (the spent media), both fungi were grown under the same conditions as described in the growth inhibition section. The growth cultures were centrifuged and then the supernatant was filtered using 0.22  $\mu\text{m}$  syringe filter to remove all fungal cells. The supernatants were used as the media for one of the dissolution experiments (Table S2

sample 16 to 21). The pH of czapek before and after growth as well as all the solutions used in the experiment were recorded for the dissolution experiment set-ups. The reason we did different experimental setups is because the fungi secrete metabolites and byproducts that change the composition of the media, as well as the pH. These changes could have impacted the dissolution of the nanoparticles. A total of 23 samples were prepared for this experiment, including controls (Table S2). All the samples were incubated at 28 °C for 10 days, which was the length of the inhibition experiment for the fungi. After the incubation period, all the samples were filtered with a EMD Millipore Amicon™ Ultra-15 Centrifugal Filter Units before analysis to remove all the nanoparticles and leave only the ions. The concentration of MoO<sub>3</sub> ions from the samples were analyzed by using atomic absorption spectroscopy (AAS, Perkin Elmer, U.S.A.). In addition, the dissolution of the MoO<sub>3</sub> was also analyzed with DI water. This experiment is to show the different dissolution behavior of these nanoparticles under different pH and media conditions used in this investigation. The experiment was conducted with the highest concentration used in this study, meaning 200 mg L<sup>-1</sup> of nanoparticles.

Table S2 Dissolution samples with corresponding pH in the experiment

|   | <b>Medium used for dissolution experiments</b>                                                    | <b>pH</b> | <b>Nanomaterial Concentration</b> | <b>Note</b>            |
|---|---------------------------------------------------------------------------------------------------|-----------|-----------------------------------|------------------------|
| 1 | Czapek media as prepared                                                                          | 4.63      | None                              | Control (blank)        |
| 2 | Czapek media as prepared                                                                          | 4.63      | 200 mg L <sup>-1</sup> h-         | Dissolution experiment |
| 3 | Czapek media as prepared                                                                          | 4.63      | 200 mg L <sup>-1</sup> α-         | Dissolution experiment |
| 4 | Supernatant of <i>A. niger</i> spent media (media with biomolecules secreted by <i>A. niger</i> ) | 2.57      | None                              | Control (blank)        |
| 5 | Supernatant of <i>A. niger</i> spent media                                                        | 2.57      | 200 mg L <sup>-1</sup> h-         | Dissolution experiment |
| 6 | Supernatant of <i>A. niger</i> spent media                                                        | 2.57      | 200 mg L <sup>-1</sup> α-         | Dissolution experiment |
| 7 | Supernatant of <i>A. flavus</i>                                                                   | 4.63      | None                              | Control (blank)        |

|    |                                                                                                                               |      |                                           |                                 |
|----|-------------------------------------------------------------------------------------------------------------------------------|------|-------------------------------------------|---------------------------------|
|    | spent media (media with biomolecules secreted by <i>A. flavus</i> )                                                           |      |                                           |                                 |
| 8  | Supernatant of <i>A. flavus</i> spent media                                                                                   | 4.63 | 200 mg L <sup>-1</sup> h-MoO <sub>3</sub> | Dissolution experiment          |
| 9  | Supernatant of <i>A. flavus</i>                                                                                               | 4.63 | 200 mg L <sup>-1</sup> α-MoO <sub>3</sub> | Dissolution experiment          |
| 10 | Czapek as prepared with pH adjusted to the final pH of <i>A. niger</i> spent media (no biomolecules secreted from any fungi)  | 2.57 | None                                      | Control (blank)                 |
| 11 | Czapek as prepared with pH adjusted to the final pH of <i>A. niger</i> spent media (no biomolecules secreted from any fungi)  | 2.57 | 200 mg L <sup>-1</sup> h-MoO <sub>3</sub> | Dissolution experiment          |
| 12 | Czapek as prepared with pH adjusted to the final pH of <i>A. niger</i> spent media (no biomolecules secreted from any fungi)  | 2.57 | 200 mg L <sup>-1</sup> α-MoO <sub>3</sub> | Dissolution experiment          |
| 13 | Czapek as prepared with pH adjusted to the final pH of <i>A. flavus</i> spent media (no biomolecules secreted from any fungi) | 4.63 | None                                      | Control (blank)                 |
| 14 | Czapek as prepared with pH adjusted to the final pH of <i>A. flavus</i> spent media (no biomolecules secreted from any fungi) | 4.63 | 200 mg L <sup>-1</sup> h-MoO <sub>3</sub> | Dissolution experiment          |
| 15 | Czapek as prepared with pH adjusted to the final pH of <i>A. flavus</i> spent media (no biomolecules secreted from any fungi) | 4.63 | 200 mg L <sup>-1</sup> α-MoO <sub>3</sub> | Dissolution experiment          |
| 16 | Czapek+ <i>A. niger</i> mycelium                                                                                              | 4.63 | None                                      | Control (blank)                 |
| 17 | Czapek+ <i>A. niger</i> mycelium                                                                                              | 4.63 | 200 mg L <sup>-1</sup> h-MoO <sub>3</sub> | Inhibition experiment condition |
| 18 | Czapek+ <i>A. niger</i> mycelium                                                                                              | 4.63 | 200 mg L <sup>-1</sup> α-MoO <sub>3</sub> | Inhibition experiment condition |
| 19 | Czapek+ <i>A. flavus</i> mycelium                                                                                             | 4.63 | None                                      | Control (blank)                 |
| 20 | Czapek+ <i>A. flavus</i>                                                                                                      | 4.63 | 200 mg L <sup>-1</sup> h-                 | Inhibition experiment           |

|    | mycelium                          |      | MoO <sub>3</sub>                          | condition                       |
|----|-----------------------------------|------|-------------------------------------------|---------------------------------|
| 21 | Czapek+ <i>A. flavus</i> mycelium | 4.63 | 200 mg L <sup>-1</sup> α-MoO <sub>3</sub> | Inhibition experiment condition |
| 22 | DI                                | 6.3  | 200 mg L <sup>-1</sup> h-MoO <sub>3</sub> | Dissolution experiment          |
| 23 | DI                                | 6.3  | 200 mg L <sup>-1</sup> α-MoO <sub>3</sub> | Dissolution experiment          |

## Results and discussions

All the prepared samples showed no presence of ions in the media after 10 days, except for the DI water (pH 6.3) that showed high dissolution after 24 hrs. The dissolution results for the nanoparticles in the media were all under the detection limit of the AAS instrument. The low dissolution observed can be expected and explained by the range of pH in the growth media. The pH of the media is acidic, since the optimal pH for *Aspergillus* spp. growth is in the range of 2 to 6.<sup>1-3</sup> The analysis of the spent media (the pH of the media at the end of the fungal growth) made the media even more acidic in the case of *A. niger* (pH 2.57). For *A. flavus*, the pH remained the same as the initial pH of the media (i.e. pH 4.63) (see table S2). In previous studies, the high dissolution rate of MoO<sub>3</sub> was reported to happen at neutral and high pH values. When the pH is shifted to more acidic, MoO<sub>3</sub> is more stable in terms of the hydrolysis process.<sup>4</sup> In addition, the stability of the nanoparticles can be explained by the nanoparticles being coated by biomolecules in the complex media. Media and fungal supernatants contain large amounts of macromolecules such as carbohydrates, proteins, lipids, and enzymes (as seen by the enzymatic and also VOC analysis of the spent media, i.e. the media supernatant after growing the fungi for 10 days). Therefore, complex surface interactions between macromolecules and nanoparticles can be developed in the fungi growth media. These interactions could inhibit the dissolution of MoO<sub>3</sub> in the media by coating the nanoparticles. This observation has been previously discussed under different environmental contexts.<sup>5</sup> Therefore, the dissolution results confirmed that there is no

significant dissolution of MoO<sub>3</sub> nanoparticles in the czapek medium under 10 days, ruling out the potential toxic effects of ions released by the MoO<sub>3</sub> nanoparticles. In the case of MoO<sub>3</sub> in DI water (pH 6 to 6.5), there was 38% and 10% of dissolution of MoO<sub>3</sub> found after 24 h. This result confirms that MoO<sub>3</sub> nanoparticles are not stable at pH close to neutral and tend to dissolve into molybdenum ions. However, in acidic medium and complex environments, such as the growth conditions used for fungi, these nanoparticles have different behavior and have low (below the detection limit of the instrument) to no dissolution.

Table S3 Dissolution of MoO<sub>3</sub> results

| Medium                            | Nanomaterials                                     | Molybdenum ionic concentrations (mg L <sup>-1</sup> ) after 10 days |
|-----------------------------------|---------------------------------------------------|---------------------------------------------------------------------|
| Czapek                            | None                                              | Blank                                                               |
| Czapek                            | 200 mg L <sup>-1</sup> <i>h</i> -MoO <sub>3</sub> | Not detected                                                        |
| Czapek                            | 200 mg L <sup>-1</sup> $\alpha$ -MoO <sub>3</sub> | Not detected                                                        |
| Supernatant <i>A. niger</i>       | None                                              | Blank                                                               |
| Supernatant <i>A. niger</i>       | 200 mg L <sup>-1</sup> <i>h</i> -MoO <sub>3</sub> | Not detected                                                        |
| Supernatant <i>A. niger</i>       | 200 mg L <sup>-1</sup> $\alpha$ -MoO <sub>3</sub> | Not detected                                                        |
| Supernatant <i>A. flavus</i>      | None                                              | Blank                                                               |
| Supernatant <i>A. flavus</i>      | 200 mg L <sup>-1</sup> <i>h</i> -MoO <sub>3</sub> | Not detected                                                        |
| Supernatant <i>A. flavus</i>      | 200 mg L <sup>-1</sup> $\alpha$ -MoO <sub>3</sub> | Not detected                                                        |
| Czapek pH adjusted                | None                                              | Blank                                                               |
| Czapek pH adjusted                | 200 mg L <sup>-1</sup> <i>h</i> -MoO <sub>3</sub> | Not detected                                                        |
| Czapek pH adjusted                | 200 mg L <sup>-1</sup> $\alpha$ -MoO <sub>3</sub> | Not detected                                                        |
| Czapek pH adjusted                | None                                              | Blank                                                               |
| Czapek pH adjusted                | 200 mg L <sup>-1</sup> <i>h</i> -MoO <sub>3</sub> | Not detected                                                        |
| Czapek pH adjusted                | 200 mg L <sup>-1</sup> $\alpha$ -MoO <sub>3</sub> | Not detected                                                        |
| Czapek+ <i>A. niger</i> mycelium  | None                                              | Blank                                                               |
| Czapek+ <i>A. niger</i> mycelium  | 200 mg L <sup>-1</sup> <i>h</i> -MoO <sub>3</sub> | Not detected                                                        |
| Czapek+ <i>A. niger</i> mycelium  | 200 mg L <sup>-1</sup> $\alpha$ -MoO <sub>3</sub> | Not detected                                                        |
| Czapek+ <i>A. flavus</i> mycelium | None                                              | Blank                                                               |
| Czapek+ <i>A. flavus</i> mycelium | 200 mg L <sup>-1</sup> <i>h</i> -MoO <sub>3</sub> | Not detected                                                        |
| Czapek+ <i>A. flavus</i> mycelium | 200 mg L <sup>-1</sup> $\alpha$ -MoO <sub>3</sub> | Not detected                                                        |
| DI water (24 h)                   | 200 mg L <sup>-1</sup> <i>h</i> -MoO <sub>3</sub> | 75.3 mg L <sup>-1</sup> detected after 24 h                         |
| DI water (24 h)                   | 200 mg L <sup>-1</sup> $\alpha$ -MoO <sub>3</sub> | 20 mg L <sup>-1</sup> detected after 24h                            |

## References

1. P. Frey-Klett, P. Burlinson, A. Deveau, M. Barret, M. Tarkka and A. Sarniguet, *Microbiology and molecular biology reviews*, 2011, 75, 583-609.
2. F. R. Passamani, T. Hernandez, N. A. Lopes, S. C. Bastos, W. D. Santiago, M. Cardoso and L. R. Batista, *Journal of food protection*, 2014, 77, 1947-1952.
3. K. A. Wheeler, B. F. Hurdman and J. I. Pitt, *International journal of food microbiology*, 1991, 12, 141-149.
4. Z. Wang, W. Zhu, Y. Qiu, X. Yi, A. von dem Bussche, A. Kane, H. Gao, K. Koski and R. Hurt, *Chemical Society Reviews*, 2016, 45, 1750-1780.
5. S. M. Louie, R. D. Tilton and G. V. Lowry, *Environmental Science: Nano*, 2016, 3, 283-310.
